# Supplementary material
Source: PubMed Central journal article supplement (PMC6279578)

# Suppl. Fig.1

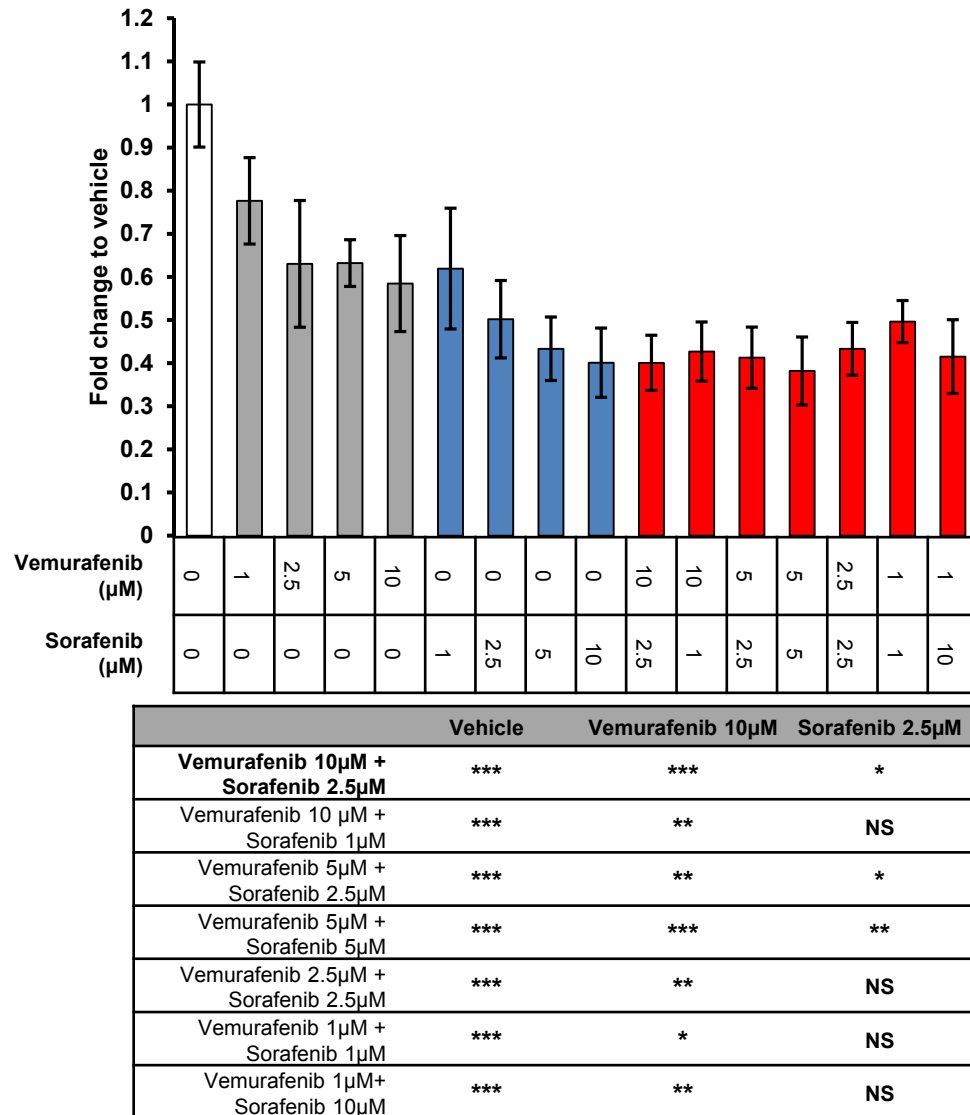

# Suppl. Fig.2

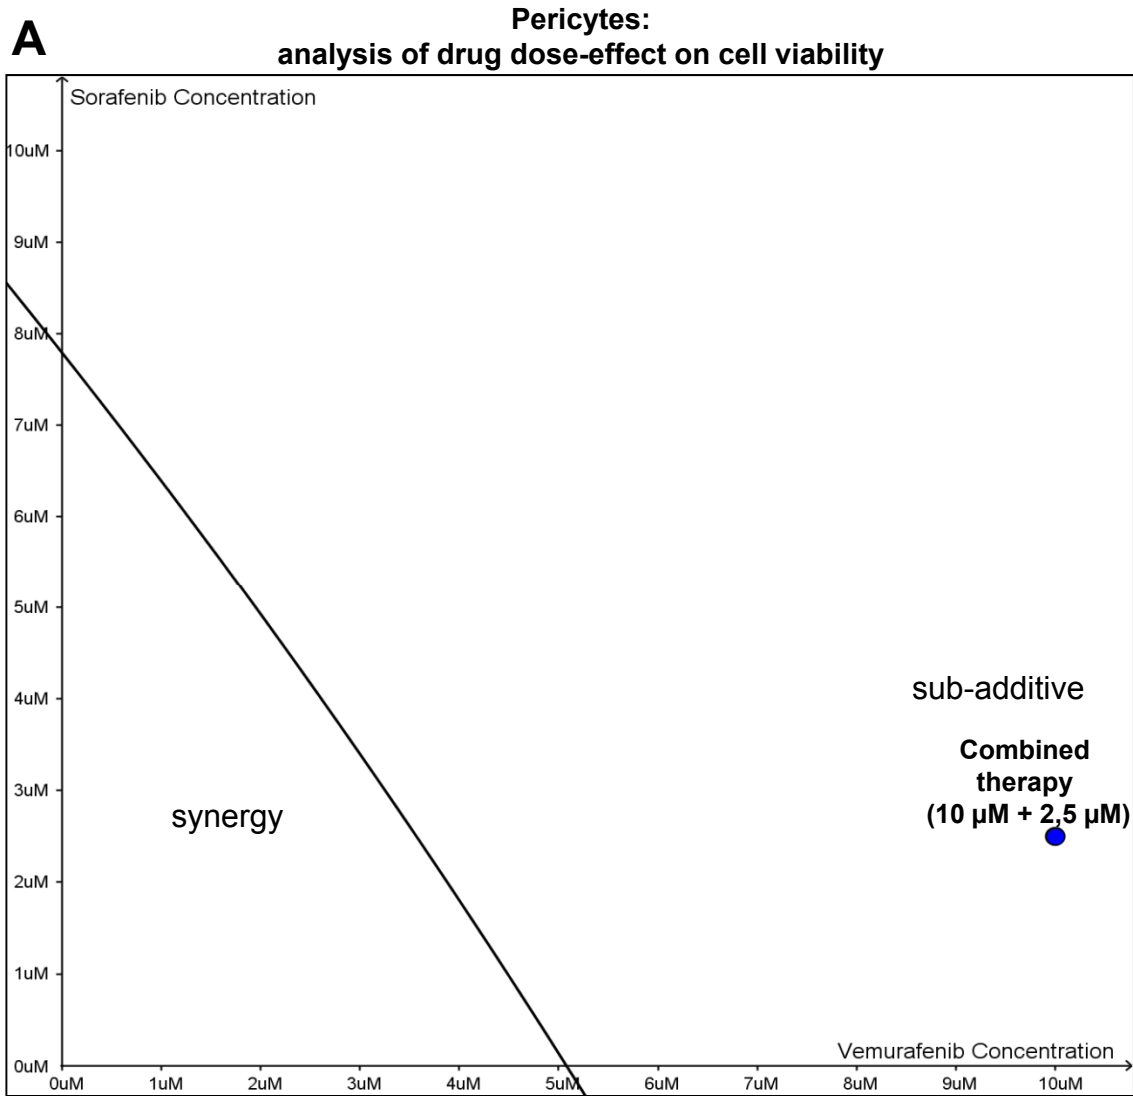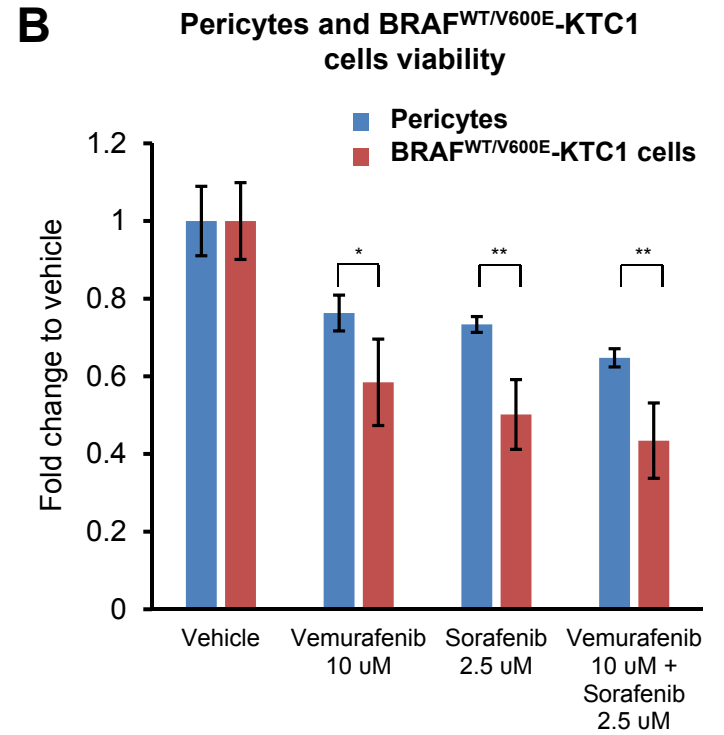

# Suppl. Fig.3

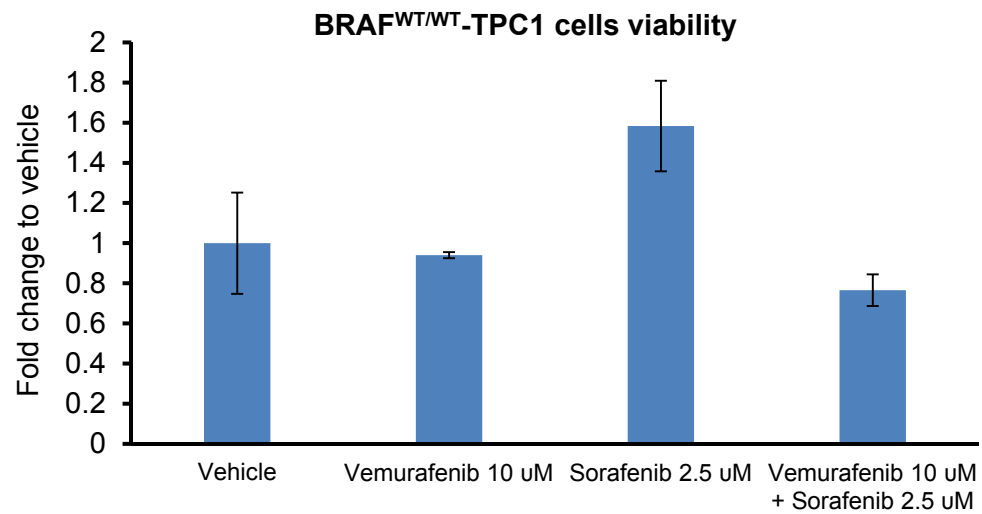

# Suppl.4

## Cytokines secretion in pericytes

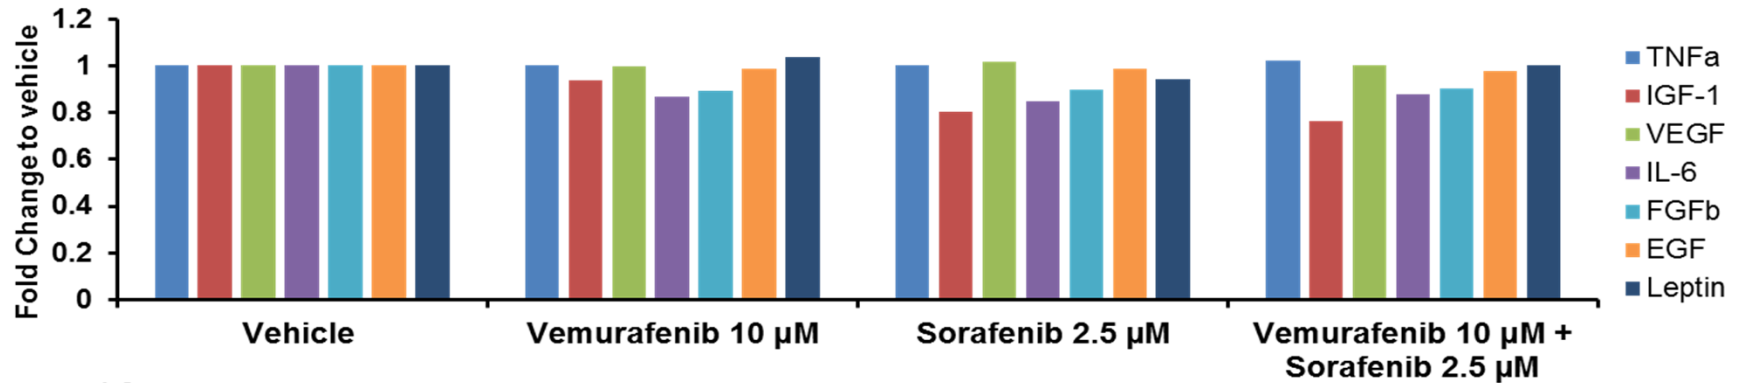

## Cytokines secretion in KTC1 cells

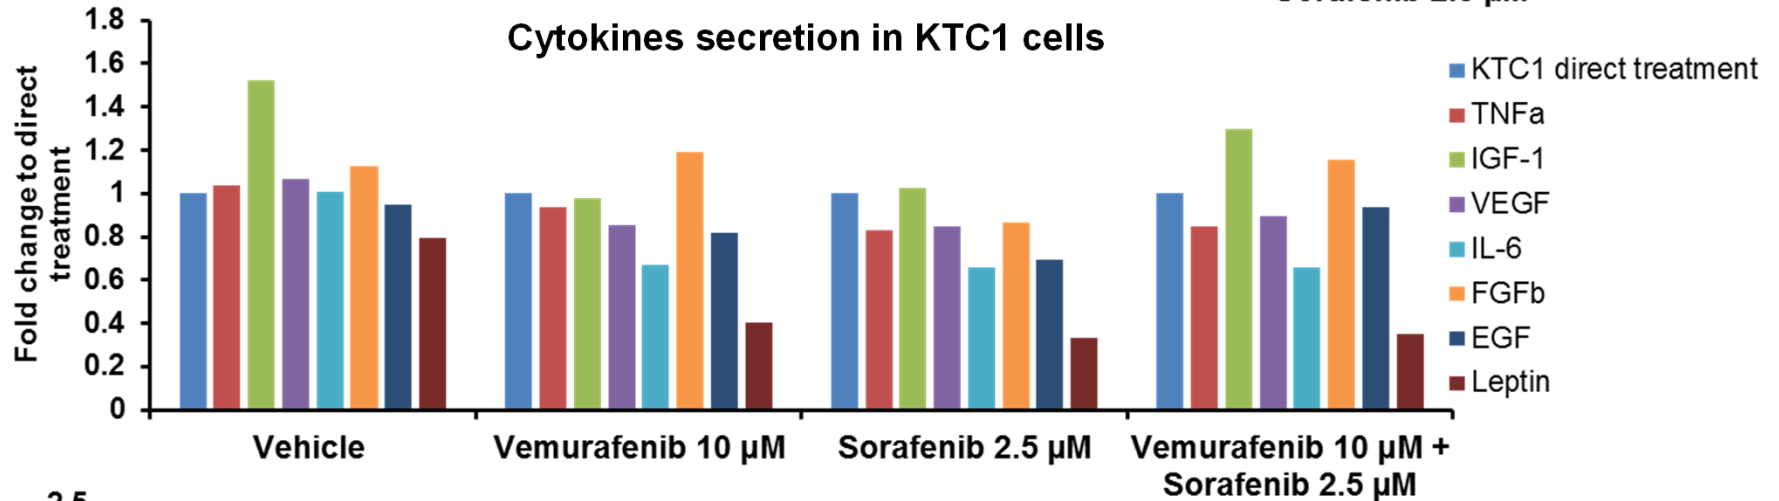

## Cytokines secretion in TPC1 cells

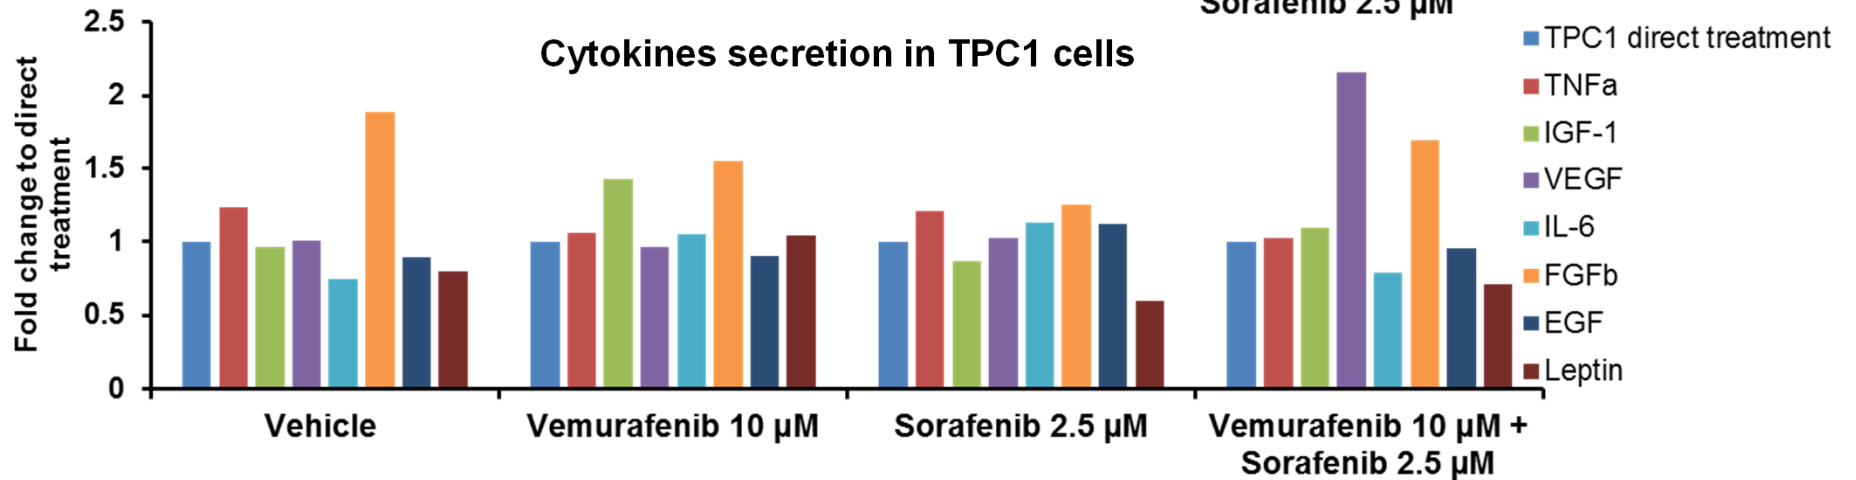

# Suppl. Fig.5

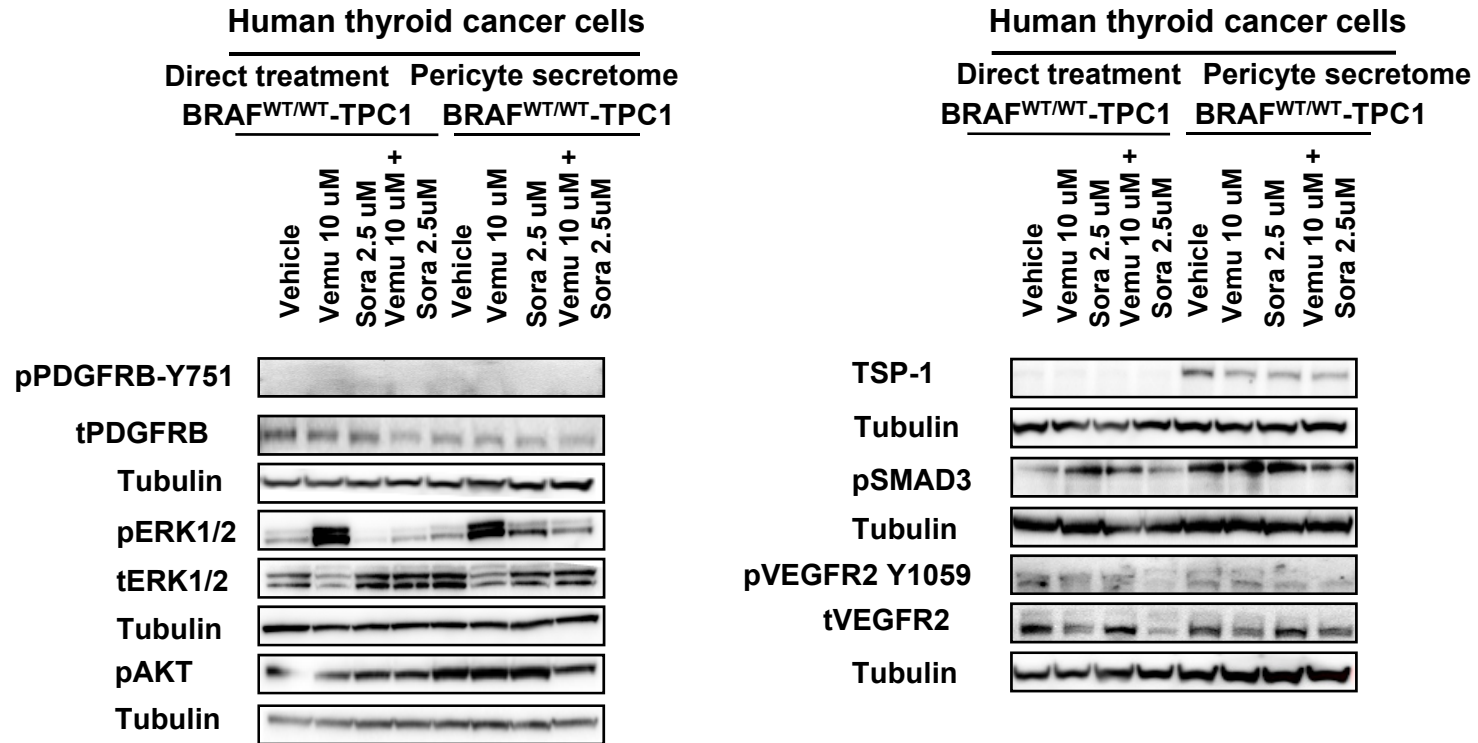

# Suppl. Fig.6

**A**

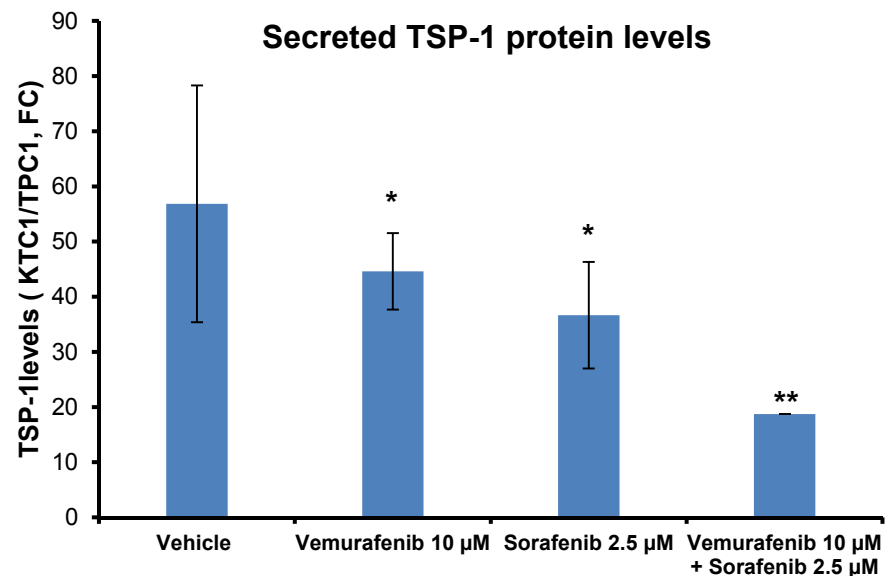

**B**

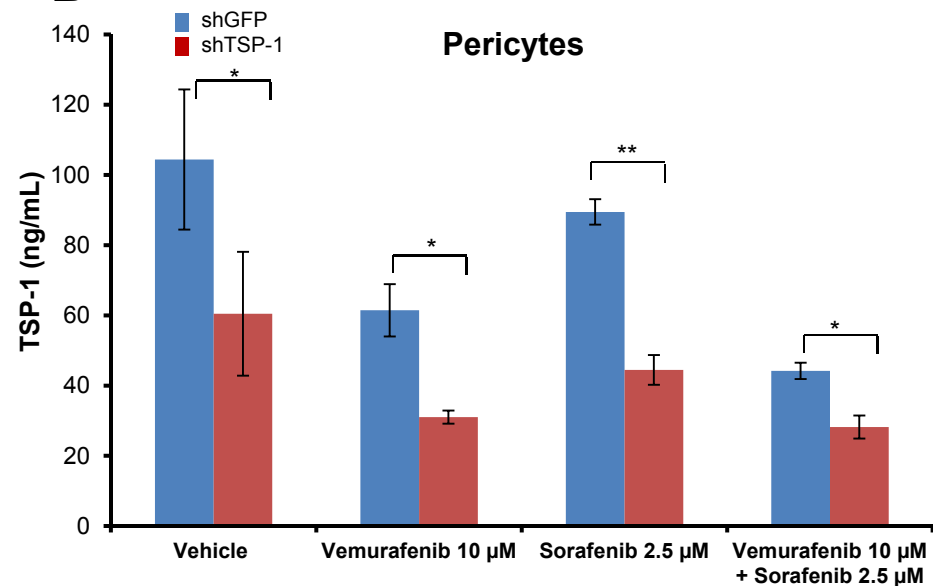

**C**

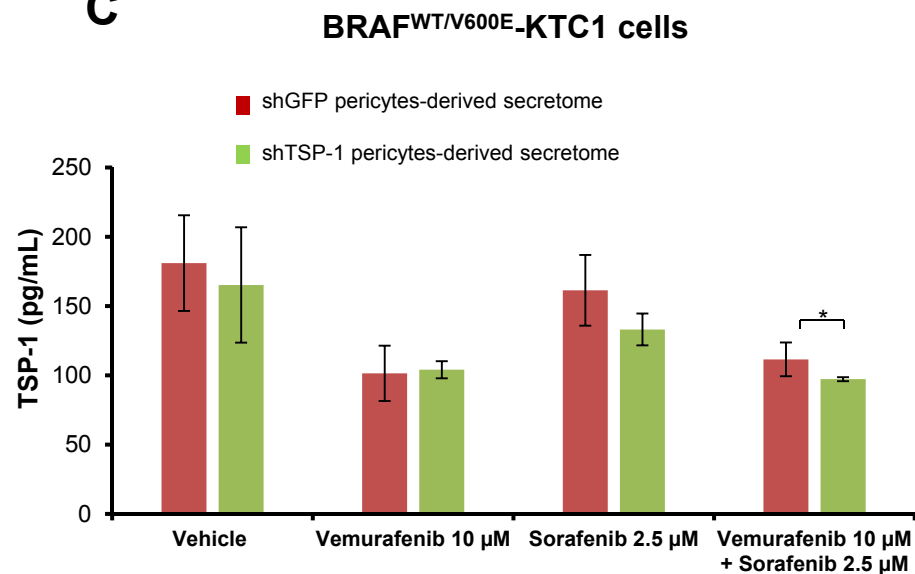

**D**

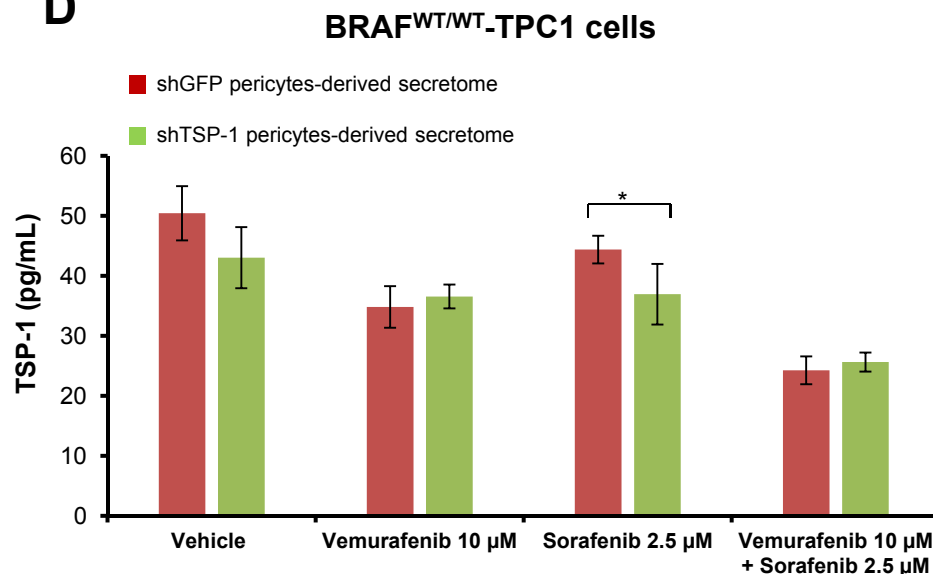

# Suppl. Fig.7

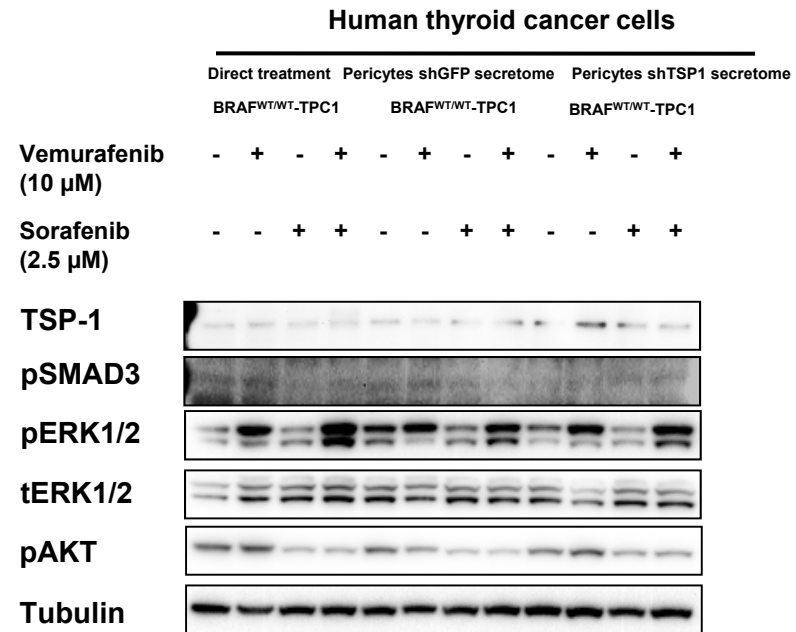

# Suppl. Fig.8

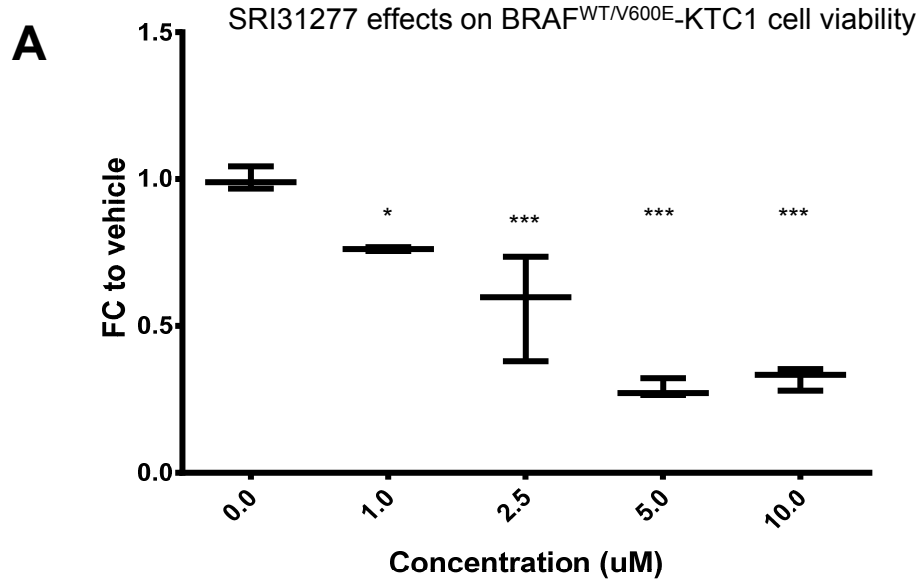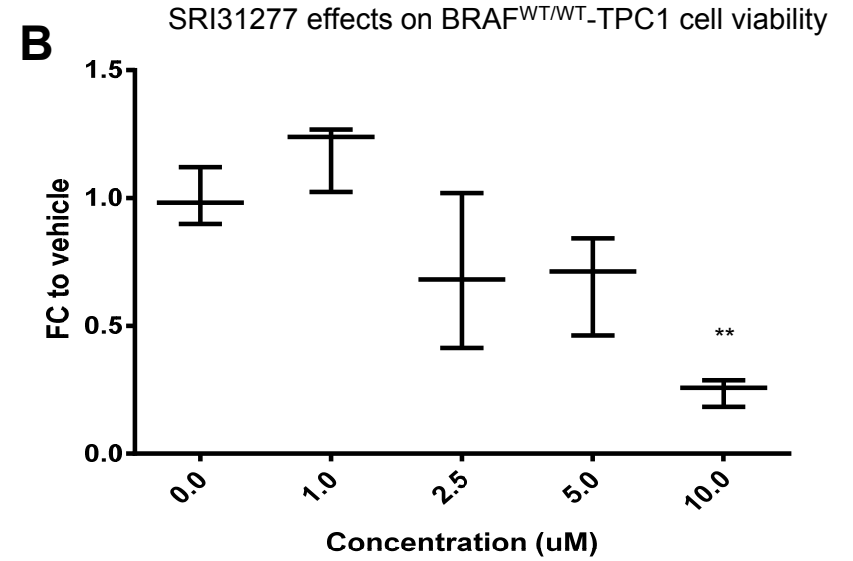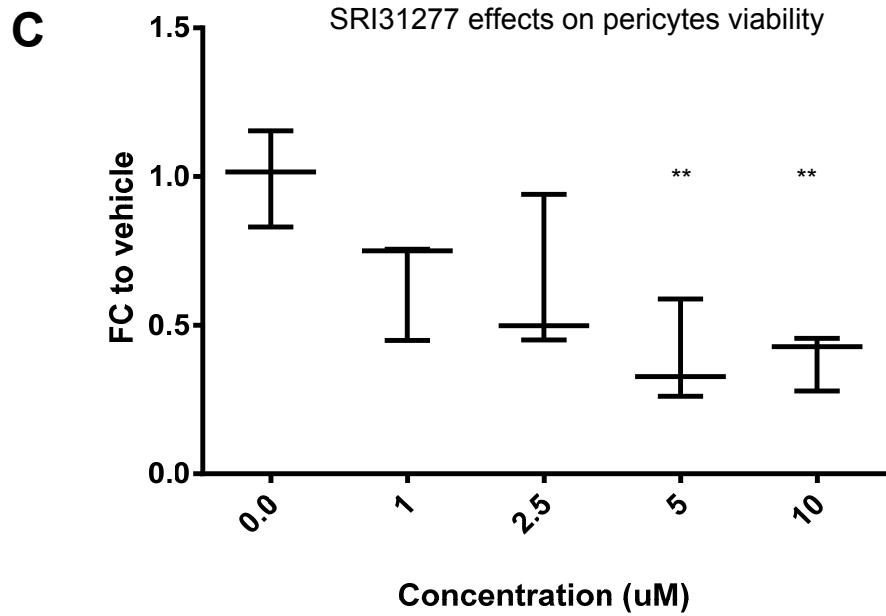



# Suppl. Fig.9

## Human thyroid cancer cells BRAF<sup>WT/WT</sup>-TPC1

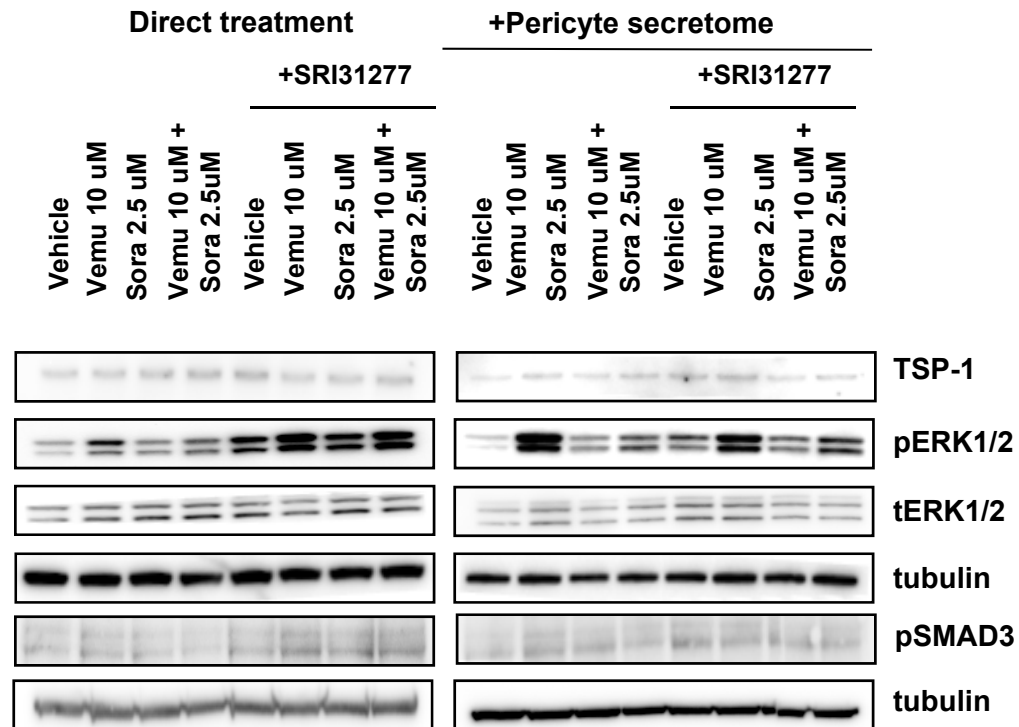

# Suppl. Fig.10

BRAF<sup>WT/V600E</sup> and hTERT  
PTC

BRAF<sup>WT/V600E</sup>-PTC

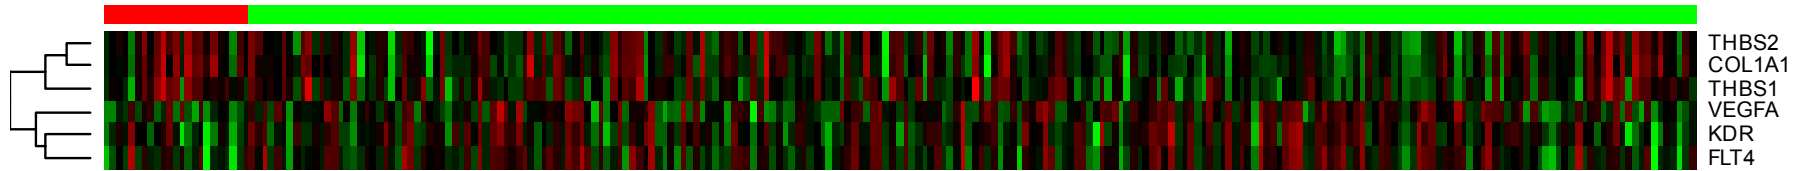

# Suppl. Fig.11

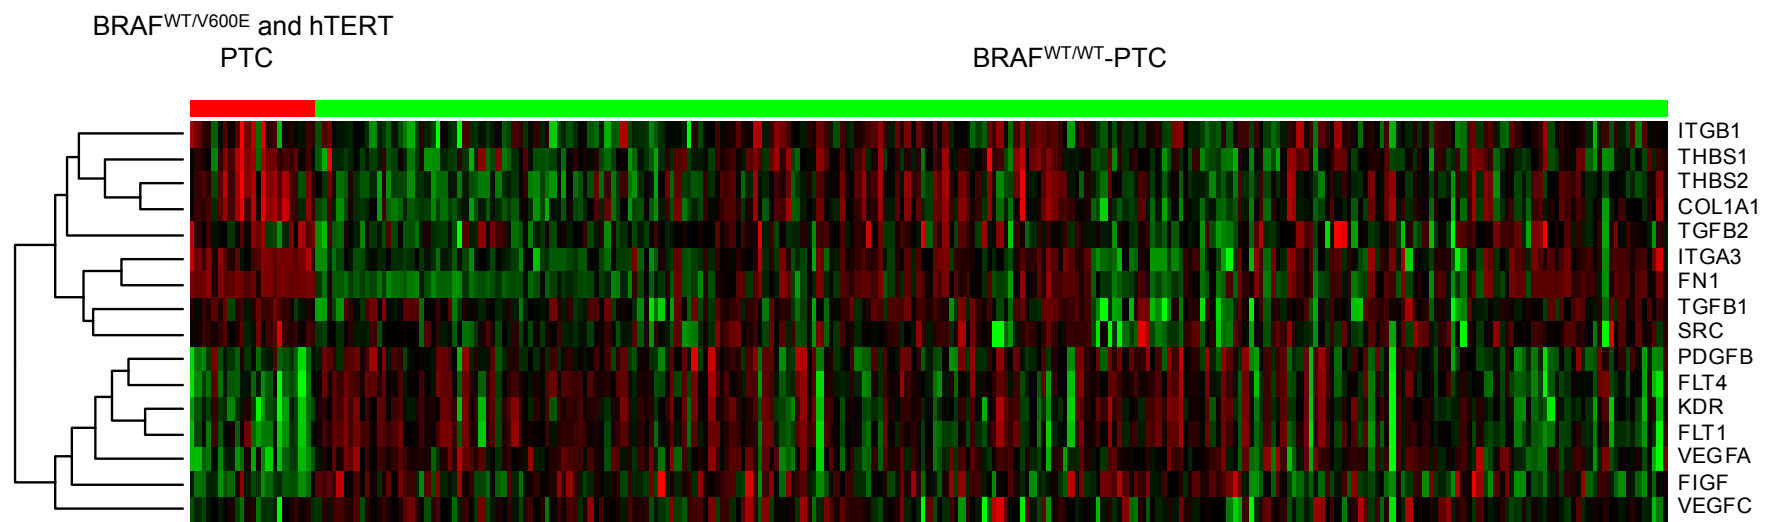

## Suppl. Fig.12

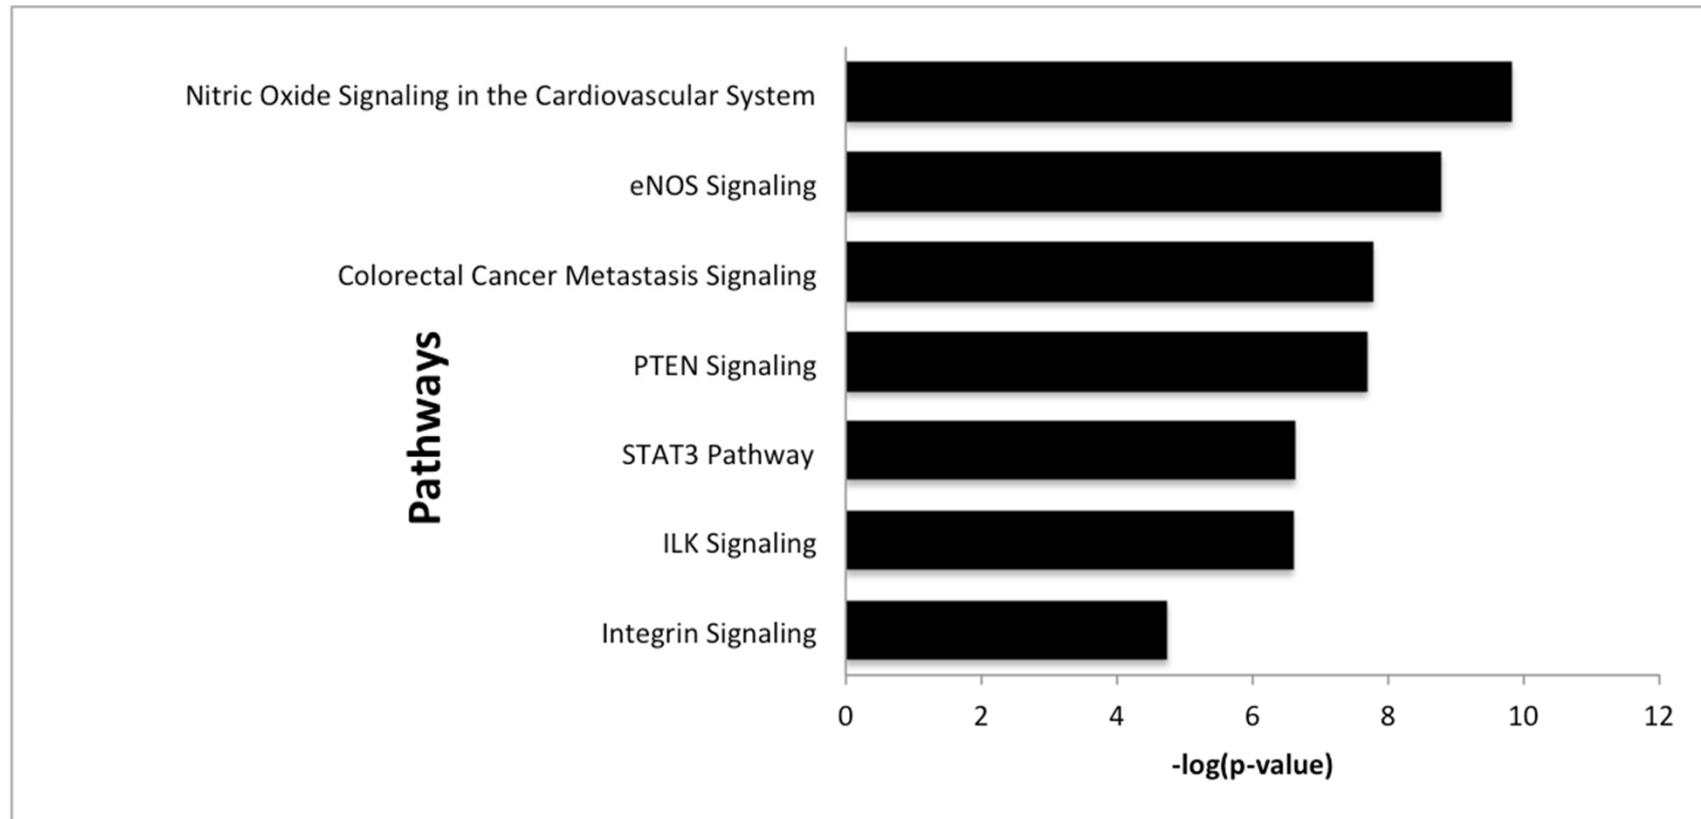

Supplement: NIHMS1503074-supplement-1.pdf [file NIHMS1503074-supplement-1.pdf]
