# Supplementary material
Source: PubMed Central journal article supplement (PMC6279578)
Supplement: NIHMS1503074-supplement-4.pdf [file NIHMS1503074-supplement-4.pdf]

**Supplementary Table 1 Antibodies list and experimental conditions for immunohistochemistry (IHC)**

| <b>Primary Antibody</b>       | <b>Company and cat.#</b>  | <b>Dilution and time of incubation<br/>(All antibodies were incubated for 45 minutes at room temperature except for some ones with overnight incubation at +4 degree)</b> | <b>Antigen retrieval<br/>(time: 30-45 minutes)</b> |
|-------------------------------|---------------------------|---------------------------------------------------------------------------------------------------------------------------------------------------------------------------|----------------------------------------------------|
| <b>NG2</b>                    | Abcam<br>Cat# 83508       | 1:1000, overnight                                                                                                                                                         | 10 minutes proteinase digestion                    |
| <b>PDGFRB</b>                 | Epitomics<br>1469-1       | 1:500, overnight                                                                                                                                                          | Citrate buffer and pressure cooker                 |
| <b><math>\alpha</math>SMA</b> | Sigma<br>A2547            | 1:20,000                                                                                                                                                                  | none                                               |
| <b>CD31</b>                   | Dako<br>M0823             | 1:30                                                                                                                                                                      | 15 minutes proteinase digestion                    |
| <b>Phospho-ERK1/2</b>         | Cell Signaling<br>9101    | 1:25, overnight                                                                                                                                                           | Citrate buffer and pressure cooker                 |
| <b>Phospho-AKT</b>            | Cell Signaling<br>4060    | 1:40, overnight                                                                                                                                                           | Citrate buffer and pressure cooker                 |
| <b>PAX8</b>                   | Proteintech<br>10036-1-AP | 1:800 or 1:1200                                                                                                                                                           | Citrate buffer and pressure cooker                 |
| <b>VEGF</b>                   | Abcam<br>Ab27620          | 1:2                                                                                                                                                                       | Citrate buffer and pressure cooker                 |
| <b>VEGFR2</b>                 | Cell Signaling<br>2479    | 1:500, overnight                                                                                                                                                          | EDTA and pressure cooker                           |
| <b>Phospho-SMAD3</b>          | Cell Signaling<br>9520    | 1:400, overnight                                                                                                                                                          | Citrate buffer and pressure cooker                 |

|                   |                                       |                  |                                       |
|-------------------|---------------------------------------|------------------|---------------------------------------|
| <b>TGFB1</b>      | Abcam<br>Ab92486                      | 1:200            | Citrate buffer and<br>pressure cooker |
| <b>TSP-1</b>      | Abcam<br>Ab1823                       | 1:25             | Citrate buffer and<br>pressure cooker |
| <b>PDGFB</b>      | Santa Cruz<br>Biotechnology<br>sc-127 | 1:50             | Citrate buffer and<br>pressure cooker |
| <b>TUNEL</b>      | Millipore<br>ST100                    | 1:3              | Proteinase K<br>digestion             |
| <b>Luciferase</b> | Promega<br>G745A                      | 1:500, overnight | No treatment                          |
| <b>Desmin</b>     | Sigma<br>D1033                        | 1:5000           | Citrate buffer and<br>pressure cooker |
