# Supplementary material
Source: PubMed Central journal article supplement (PMC6279578)
Supplement: NIHMS1503074-supplement-5.pdf [file NIHMS1503074-supplement-5.pdf]

Suppl. Table 2. Log2 Fold Changes (FC) of some genes differentially expressed in BRAFV600E-PTC vs BRAFWT-PTC

|        | log base 2 FC | AveExpr     | t            | P.Value     | FC           |
|--------|---------------|-------------|--------------|-------------|--------------|
| FN1    | 3.503846518   | 16.72078701 | 17.06815105  | 2.72E-51    | 11.34391339  |
| ITGA3  | 1.098755555   | 13.86520533 | 15.23524384  | 5.77E-43    | 2.141698734  |
| FIGF   | -0.818465792  | 1.375784482 | -9.727527552 | 1.62E-20    | -1.763529602 |
| VEGFA  | -0.755816866  | 12.5702292  | -9.317513801 | 4.46E-19    | -1.688587414 |
| FLT4   | -0.768900806  | 9.124730001 | -8.385426309 | 5.79E-16    | -1.703971028 |
| COL1A1 | 1.464970136   | 12.72964536 | 7.879607575  | 2.26E-14    | 2.760577561  |
| FLT1   | -0.706200224  | 11.23411178 | -7.710106995 | 7.42E-14    | -1.631501399 |
| PDGFB  | -0.470516399  | 9.1468419   | -7.441684995 | 4.70E-13    | -1.385605343 |
| KDR    | -0.686536296  | 10.6454029  | -7.0340228   | 7.03E-12    | -1.609414902 |
| THBS2  | 1.124692302   | 8.73434242  | 6.781923802  | 3.53E-11    | 2.180550348  |
| ITGB1  | 0.277196372   | 12.86294234 | 6.713470983  | 5.43E-11    | 1.211837598  |
| SMAD3  | 0.310456268   | 11.11605421 | 6.679642469  | 6.71E-11    | 1.240099833  |
| TGFB2  | 0.744569111   | 8.547815665 | 6.596540016  | 1.12E-10    | 1.675473781  |
| SRC    | 0.279922124   | 9.980251825 | 6.035695509  | 3.19E-09    | 1.214129344  |
| CSPG4  | -0.553701655  | 8.790612582 | -6.021430487 | 3.46E-09    | -1.467847058 |
| FBXW11 | 0.170641797   | 10.12396311 | 4.757978887  | 2.60E-06    | 1.12555909   |
| THBS1  | 0.644020019   | 10.21206809 | 4.71987327   | 3.11E-06    | 1.562677444  |
| PECAM1 | -0.301894147  | 10.42164559 | -4.701309833 | 3.39E-06    | -1.232761872 |
| TGFB1  | 0.317298219   | 10.4253761  | 4.588202581  | 5.73E-06    | 1.245994949  |
| THY1   | -0.368367743  | 10.91049017 | -4.20727663  | 3.09E-05    | -1.290891496 |
| SMAD2  | 0.062723724   | 11.13886159 | 2.684588622  | 0.00751564  | 1.044435734  |
| VEGFC  | -0.100769036  | 9.996714091 | -2.20547531  | 0.027898756 | -1.072344929 |
| PDGFA  | 0.122203965   | 7.981681542 | 1.999810592  | 0.046089401 | 1.088396306  |
