# Supplementary material
Source: PubMed Central journal article supplement (PMC6279578)
Supplement: NIHMS1503074-supplement-6.pdf [file NIHMS1503074-supplement-6.pdf]

Suppl. Table 3. Log2 Fold Changes (FC) of some genes differentially expressed in PTC with BRAFV600E and hTERT mutation vs BRAFV600E-PTC

|        | log base 2 FC | AveExpr     | t            | P.Value     | FC           |
|--------|---------------|-------------|--------------|-------------|--------------|
| COL1A1 | 1.24276643    | 12.72964536 | 2.869360307  | 0.004296267 | 2.366518877  |
| THBS2  | 1.064529353   | 8.73434242  | 2.755475662  | 0.006085795 | 2.091487467  |
| KDR    | -0.609118464  | 10.6454029  | -2.678932609 | 0.007641815 | -1.525326898 |
| VEGFA  | -0.470839549  | 12.5702292  | -2.491587573 | 0.013057284 | -1.385915741 |
| FLT4   | -0.501363914  | 9.124730001 | -2.347078729 | 0.019330783 | -1.415551182 |
| THBS1  | 0.654406274   | 10.21206809 | 2.058724249  | 0.040065143 | 1.57396807   |
