# Supplementary material
Source: PubMed Central journal article supplement (PMC6279578)
Supplement: NIHMS1503074-supplement-7.pdf [file NIHMS1503074-supplement-7.pdf]

Suppl. Table 4. Log2 Fold Changes (FC) of some genes differentially expressed in PTC with BRAFV600E and hTERT mutation vs BRAFWT-PTC

|        | log base 2 FC | AveExpr     | t            | P.Value     | FC           |
|--------|---------------|-------------|--------------|-------------|--------------|
| FN1    | 3.96557226    | 16.72078701 | 8.365631193  | 6.70E-16    | 15.62270385  |
| ITGA3  | 1.174065803   | 13.86520533 | 7.050050164  | 6.34E-12    | 2.256467192  |
| VEGFA  | -1.226656415  | 12.5702292  | -6.548741432 | 1.51E-10    | -2.340239876 |
| COL1A1 | 2.707736566   | 12.72964536 | 6.307157417  | 6.51E-10    | 6.532958911  |
| FLT4   | -1.27026472   | 9.124730001 | -5.999299034 | 3.93E-09    | -2.412058204 |
| KDR    | -1.295654761  | 10.6454029  | -5.748850397 | 1.61E-08    | -2.45488384  |
| THBS2  | 2.189221655   | 8.73434242  | 5.716896922  | 1.92E-08    | 4.560593724  |
| FLT1   | -1.003574098  | 11.23411178 | -4.744969669 | 2.76E-06    | -2.004960894 |
| FIGF   | -0.848506092  | 1.375784482 | -4.367252926 | 1.55E-05    | -1.800635404 |
| THBS1  | 1.298426293   | 10.21206809 | 4.120972486  | 4.45E-05    | 2.4596044    |
| PDGFB  | -0.569556193  | 9.1468419   | -3.901077156 | 0.000109576 | -1.484066967 |
| SRC    | 0.353283545   | 9.980251825 | 3.298868091  | 0.001043635 | 1.277464805  |
| ITGB1  | 0.293857573   | 12.86294234 | 3.082108375  | 0.002174802 | 1.225913829  |
| TGFB1  | 0.431832536   | 10.4253761  | 2.704218341  | 0.007092145 | 1.348945944  |
| VEGFC  | -0.236300956  | 9.996714091 | -2.239711118 | 0.025571327 | -1.177968496 |
| TGFB2  | 0.579122933   | 8.547815665 | 2.221945448  | 0.026757151 | 1.493940751  |
